# Supplementary material for: A MET-PTPRK kinase-phosphatase rheostat controls ZNRF3 and Wnt signaling
Source: eLife journal article supplement (doi:10.7554/elife.70885), 2021-09-30
Supplement: fig2-data2 [file Densitometric analysis for Figure 2A.xlsx]

## Sheet: Sheet1
HA	No	Group	Index	Name	Area(mm2)	AU-BG	B	Std	Ratio(%)	AU/mm2	(A-B)/mm2	Calibrated			pTyr/HA
2	1	A	A-1		1781453	183367130975		S	10000000	33536445849	10293120651	-------		2	1						1	0.31	0.42	0.27	0.18	0.05
3	1	A	A-2		1871735	568074640237			30980178	53593488618	30350163419	-------		3	0.310716
4	1	A	A-3		1894305	314524317552			17152710	39846999803	16603674605	-------		4	0.424588
5	1	A	A-4		1867973	476622794018			25992815	48758828928	25515503730	-------		5	0.27009
6	1	A	A-5		1867973	470731494018			25671531	48443444333	25200119135	-------		6	0.182801
7	1	A	A-6		1960942	815049064865			44449028	64807484085	41564158886	-------		7	0.0495072
pTyr	No	Group	Index	Name	Area(mm2)	AU-BG	B	Std	Ratio(%)	AU/mm2	(A-B)/mm2	Calibrated
2	1	A	A-1		1634745	1555002334920		S	10000000	373727522828	95121993199	-------
3	1	A	A-2		1697620	1496851409340			9626040	366779048037	88173518408	-------
4	1	A	A-3		1697620	1132482809340			7282837	345315553893	66710024264	-------
5	1	A	A-4		1655704	1091673026394			7020395	344539615224	65934085595	-------
6	1	A	A-5		1655704	729729426394			4692787	322679204894	44073675265	-------
7	1	A	A-6		1718578	342185500814			2200547	298516491942	19910962313	-------
