# Supplementary material for: A MET-PTPRK kinase-phosphatase rheostat controls ZNRF3 and Wnt signaling
Source: eLife journal article supplement (doi:10.7554/elife.70885), 2021-09-30
Supplement: fig2-data2 [file Densitometric analysis for Figure 2B.xlsx]

## Sheet: Sheet1
HA	No	Group	Index	Name	Area(mm2)	AU-BG	B	Std	Ratio(%)	AU/mm2	(A-B)/mm2	Calibrated			pTyr/HA
2	1	A	A-1		2521442	7487048756981		S	10000000	320344270810	296935254893	-------		2	1
3	1	A	A-2		2062509	6436238926704			8596497	335467714852	312058698935	-------		3	0.837433
4	1	A	A-3		2373121	7431182530100			9925383	336548599985	313139584068	-------		4	0.823647
5	1	A	A-4		2315621	6105053325838			8154152	287055554502	263646538585	-------		5	0.517356
6	1	A	A-5		2549386	6554624256249			8754617	280515024747	257106008830	-------		6	0.517845
7	1	A	A-6		2189333	6594756477225			8808219	324631124744	301222108826	-------		7	0.408402
1	2	~	1		2420949	0.00000	B		-------	23409015917	0.00000	-------							Western	1	0.31	0.42	0.27	0.18	0.05
																			IP_ZNRF3	1	0.84	0.82	0.52	0.52	0.41
pTyr	No	Group	Index	Name	Area(mm2)	AU-BG	B	Std	Ratio(%)	AU/mm2	(A-B)/mm2	Calibrated
2	1	A	A-1		2548311	5962929747325		S	10000000	900594806992	233995361939	-------								1
3	1	A	A-2		2084005	4292709792519			7198994	872583133502	205983688449	-------								0.9
4	1	A	A-3		2398916	4874702233163			8175012	869803800654	203204355601	-------								0.8
5	1	A	A-4		2341415	2515522839223			4218602	774035440231	107435995178	-------								0.7
6	1	A	A-5		2577868	2703315519911			4533536	771465788618	104866343565	-------								0.6
7	1	A	A-6		2183960	2145040868901			3597294	764817420544	98217975491	-------								0.5
1	2	~	1		2420949	0.00000	B		-------	666599445053	0.00000	-------								0.4
																				0.3
																				0.2
																				0.1
																				0
