# Supplementary material for: A MET-PTPRK kinase-phosphatase rheostat controls ZNRF3 and Wnt signaling
Source: eLife. 2021 Sep 30;10:e70885. doi: 10.7554/eLife.70885 (PMC8516413; doi:10.7554/eLife.70885)
Supplement: Figure 2—source data 3. [file elife-70885-fig2-data3.xlsx]

## Sheet: Sheet1
	HA	No	Group	Index	Name	Area(mm2)	AU-BG	B	Std	Ratio(%)	AU/mm2	(A-B)/mm2	Calibrated
	2	1	A	A-1		26.3161	1.69533e+08		S	100	6.82917e+06	6.4422e+06	-------
	3	1	A	A-2		22.5113	1.6363e+08			96.5178	7.65575e+06	7.26878e+06	-------
	4	1	A	A-3		25.0478	1.34905e+08			79.5741	5.77285e+06	5.38588e+06	-------
	5	1	A	A-4		26.3161	1.61233e+08			95.1042	6.51377e+06	6.1268e+06	-------
	1	2	~	1		21.2431	0	B		-------	386970	0	-------
	pY	No	Group	Index	Name	Area(mm2)	AU-BG	B	Std	Ratio(%)	AU/mm2	(A-B)/mm2	Calibrated			pY/HA
	2	1	A	A-1		5.79308	460406		S	100	1.45788e+06	79475.1	-------		2	1
	3	1	A	A-2		6.01879	931695			202.364	1.5332e+06	154798	-------		3	2.09665
	4	1	A	A-3		5.94355	-521215			-113.208	1.29071e+06	-87694.3	-------		4	-1.42267
	5	1	A	A-4		5.64261	-1.23463e+06			-268.162	1.1596e+06	-218806	-------		5	-2.81967
	1	2	~	1		5.79308	0	B		-------	1.37841e+06	0	-------
