# Supplementary material for: A MET-PTPRK kinase-phosphatase rheostat controls ZNRF3 and Wnt signaling
Source: eLife. 2021 Sep 30;10:e70885. doi: 10.7554/eLife.70885 (PMC8516413; doi:10.7554/eLife.70885)
Supplement: Figure 5—figure supplement 1—source data 2. [file elife-70885-fig5-figsupp1-data2.xlsx]

## Sheet: Figure 5-figure supplement 1A
	LRP6	No	Group	Index	Name	Area(mm2)	AU-BG	B	Std	Ratio(%)	AU/mm2	(A-B)/mm2	Calibrated
		5	~	1		1.83788	0	B		-------	4.16911e+06	0	-------
siC	-	8	~	2		3.67576	5561309		S	100	5.68208e+06	1.51297e+06	-------					LRP6/Tub
	Crizotinib	9	~	3		2.54186	2.41831e+06			43.4845	5.1205e+06	951392	-------					1	1
siZR	-	10	~	4		4.37974	8.62745e+06			155.134	6.13897e+06	1.96985e+06	-------					0.250159	0.3
	Crizotinib	11	~	5		5.38466	1.16056e+07			208.685	6.32442e+06	2.15531e+06	-------					1.52924	1
	Tub	No	Group	Index	Name	Area(mm2)	AU-BG	B	Std	Ratio(%)	AU/mm2	(A-B)/mm2	Calibrated					1.1475	0.750374
siC	-	1	A	A-1		10.0116	2.8628e+06		S	100	650909	285948	-------
	Crizotinib	1	A	A-2		10.06	4.97634e+06			173.828	859628	494667	-------
siZR	-	1	A	A-3		10.0654	2.90416e+06			101.445	653492	288531	-------
	Crizotinib	1	A	A-4		10.4039	5.20629e+06			181.86	865378	500417	-------
	1	2	~	1		9.67305	0	B		-------	364961	0	-------

## Sheet: Figure 5-figure supplement 1B
	Channel	No	Group	Index	Name	Area(mm2)	AU-BG	B	Std	Ratio(%)	AU/mm2	(A-B)/mm2	Calibrated			HGF(50ng/ml)	WNT3a (20%)		bCat/GAPDH
	1	1	A	A-1		20.4907	357629		S	100	209779	17453.2	-------		siCo	-	-	1	1
	1	1	A	A-2		21.8772	3.2384e+06			905.519	340352	148026	-------				+	10.8947	10.9
	1	1	A	A-3		19.244	357591			99.9894	210908	18581.9	-------			+	-	1.25133	1.3
	1	1	A	A-4		22.4039	3.0402e+06			850.099	328026	135700	-------				+	17.5742	17.6
	1	1	A	A-5		20.2865	220045			61.5287	203173	10846.8	-------		siMET	-	-	3.48103	0.994579
	1	1	A	A-6		19.7706	2.31803e+06			648.166	309572	117246	-------				+	23.0834	6.59527
	1	1	A	A-7		21.6139	310578			86.8438	206695	14369.4	-------			+	-	3.23111	0.923175
	1	1	A	A-8		21.8342	2.58508e+06			722.838	310721	118396	-------				+	21.3898	6.11138
	1	2	B	A-1		23.1723	2.64915e+06		S	100	306650	114324	-------
	1	2	B	A-2		24.0913	2.20184e+06			83.1151	283722	91395.9	-------
	1	2	B	A-3		23.3604	2.11684e+06			79.9065	282942	90616.6	-------
	1	2	B	A-4		23.9892	1.28144e+06			48.3719	245743	53417.6	-------
	1	2	B	A-5		21.1034	468249			17.6755	214514	22188.4	-------
	1	2	B	A-6		22.3071	743861			28.0793	225672	33346.4	-------
	1	2	B	A-7		20.8078	712021			26.8773	226545	34218.9	-------
	1	2	B	A-8		19.8674	895240			33.7935	237387	45060.8	-------
	1	3	~	1		21.1034	0	B		-------	192326	0	-------

## Sheet: Figure 5-figure supplement 1C
	Channel	No	Group	Index	Name	Area(mm2)	AU-BG	B	Std	Ratio(%)	AU/mm2	(A-B)/mm2	Calibrated				bCat/GAPDH
	bCat	1	A	A-1		19.9534	856927		S	100	241011	42946.5	-------		siCo	C	1
		1	A	A-2		20.9637	5.50414e+06			642.311	460621	262556	-------			W (20%)	6.86496
		1	A	A-3		18.4379	1.36493e+06			159.283	272093	74028.7	-------			H (100ng/ml)	1.50739
		1	A	A-4		20.4585	7.4983e+06			875.023	564577	366513	-------			WH	11.1
		1	A	A-5		18.943	2.28978e+06			267.209	318942	120877	-------		siZR	C	5.93388
		1	A	A-6		20.9637	9.30252e+06			1085.57	641810	443745	-------			W (20%)	25.0305
		1	A	A-7		19.4482	3.24053e+06			378.157	364688	166624	-------			H (100ng/ml)	9.03676
		1	A	A-8		22.4791	9.13215e+06			1065.69	604315	406251	-------			WH	21.887
	GAPDH	3	B	A-1		17.3362	7.52077e+06		S	100	631882	433817	-------
		3	B	A-2		17.5942	7.03672e+06			93.5638	598010	399945	-------
		3	B	A-3		18.2982	7.947e+06			105.667	632370	434306	-------
		3	B	A-4		16.9171	5.92867e+06			78.8306	548519	350454	-------
		3	B	A-5		18.2713	3.38668e+06			45.0311	383420	185355	-------
		3	B	A-6		18.7227	3.26174e+06			43.3698	372277	174213	-------
		3	B	A-7		18.2982	3.14718e+06			41.8466	370059	171994	-------
		3	B	A-8		17.3255	3.66189e+06			48.6904	409423	211358	-------
	1	2	~	1		21.4688	0	B		-------	198064	0	-------

## Sheet: Figure 5-figure supplement 1D
	Channel	No	Group	Index	Name	Area(mm2)	AU-BG	B	Std	Ratio(%)	AU/mm2	(A-B)/mm2	Calibrated				bCat/GAPDH
	bCat	1	A	A-1		22.7102	402961		S	100	232607	17743.6	-------		Co	C	1
		1	A	A-2		23.6452	3.51631e+06			872.619	363574	148711	-------			W(5%)	6.2057
		1	A	A-3		21.3667	316082			78.4398	229656	14793.2	-------			H (100ng/ml)	0.687809
		1	A	A-4		23.0756	4.8528e+06			1204.29	425163	210300	-------			WH	10.358
		1	A	A-5		20.5069	850353			211.026	256330	41466.7	-------		RSPO3 (1%)	C	1.82894
		1	A	A-6		22.506	3.61357e+06			896.755	375424	160561	-------			W(5%)	11.6446
		1	A	A-7		23.0756	918633			227.971	254673	39809.7	-------			H (100ng/ml)	1.96468
		1	A	A-8		22.7209	9.96833e+06			2473.77	653592	438729	-------			WH	19.7402
	1	2	~	1		23.3497	0	B		-------	214863	0	-------
	Channel	No	Group	Index	Name	Area(mm2)	AU-BG	B	Std	Ratio(%)	AU/mm2	(A-B)/mm2	Calibrated
	GAPDH	1	A	A-1		22.7102	6.1141e+07		S	100	2.91598e+06	2.69223e+06	-------
		1	A	A-2		23.6452	8.59738e+07			140.616	3.85974e+06	3.63599e+06	-------
		1	A	A-3		21.3667	6.9727e+07			114.043	3.48711e+06	3.26335e+06	-------
		1	A	A-4		23.0756	7.10864e+07			116.266	3.30434e+06	3.08059e+06	-------
		1	A	A-5		22.2158	7.05454e+07			115.381	3.39922e+06	3.17546e+06	-------
		1	A	A-6		20.7971	4.7085e+07			77.0105	2.48778e+06	2.26402e+06	-------
		1	A	A-7		23.0756	7.09445e+07			116.034	3.2982e+06	3.07444e+06	-------
		1	A	A-8		22.7209	7.66197e+07			125.316	3.59597e+06	3.37221e+06	-------
	1	2	~	1		23.3497	0	B		-------	223756	0	-------
