# Supplementary material for: A MET-PTPRK kinase-phosphatase rheostat controls ZNRF3 and Wnt signaling
Source: eLife. 2021 Sep 30;10:e70885. doi: 10.7554/eLife.70885 (PMC8516413; doi:10.7554/eLife.70885)
Supplement: Figure 5—source data 2. [file elife-70885-fig5-data2.xlsx]

## Sheet: Figure 5A
Name	Area(mm2)	AU-BG	B	Std	Ratio(%)	AU/mm2	(A-B)/mm2	Calibrated
	3.86922	0	B		-------	2.67497e+06	0	-------			HGF (50ng/ml)	FZD5/ERK			rel. Change	convert to %	set lane2 as 1	convert to %	set lane 2 as 0%
V5-FZD5	12.3116	7.51222e+07		S	100	8.77669e+06	6.10172e+06	-------	V5-FZD5		0	1
	12.3116	5.7041e+07			75.931	7.30807e+06	4.6331e+06	-------		ZNRF3-HA	0	0.736321			0.263679	26.3679	1	100	0
	11.5432	5.4341e+07			72.3369	7.3826e+06	4.70763e+06	-------			15	0.664569			0.335431	33.5431	1.27212	127.212	-27.2119
	10.7801	4.99369e+07			66.4743	7.3073e+06	4.63233e+06	-------			30	0.645107			0.354893	35.4893	1.34593	134.593	-34.5928
	11.8871	4.1047e+07			54.6403	6.12804e+06	3.45307e+06	-------			45	0.557776			0.442224	44.2224	1.67713	167.713	-67.7128
	11.7366	5.45655e+07			72.6357	7.32413e+06	4.64916e+06	-------			60	0.677982			0.322018	32.2018	1.22125	122.125	-22.1249
	13.5853	7.6878e+07			102.337	8.3339e+06	5.65893e+06	-------			90	0.87801			0.12199	12.199	0.462644	46.2644	53.7356
	13.5853	7.94888e+07			105.813	8.52607e+06	5.8511e+06	-------			120	0.94351			0.0564901	5.64901	0.214238	21.4238	78.5762
ERK	5.54588	1.98076e+07		S	100	3.82307e+06	3.57158e+06	-------
	5.9543	2.0426e+07			103.122	3.68195e+06	3.43047e+06	-------
	6.10477	2.15601e+07			108.848	3.78317e+06	3.53169e+06	-------
	5.87906	2.04105e+07			103.044	3.72321e+06	3.47173e+06	-------
	6.33585	1.94037e+07			97.961	3.31401e+06	3.06253e+06	-------
	6.33047	2.12209e+07			107.135	3.60367e+06	3.35218e+06	-------
	5.72859	2.30869e+07			116.556	4.2816e+06	4.03012e+06	-------
	5.92743	2.22138e+07			112.148	3.99911e+06	3.74763e+06	-------
	29.4222	0	B		-------	251485	0	-------

## Sheet: Figure 5D
b-cat	No	Group	Index	Name	Area(mm2)	AU-BG	B	Std	Ratio(%)	AU/mm2	(A-B)/mm2	Calibrated			HGF	b-cat/erk
1	1	A	A-1		22.7048	602856		S	100	233527	26551.9	-------			0	1
1	1	A	A-2		21.9471	7.11743e+06			1180.62	531275	324300	-------		Wnt3a (20%)	100	9.11633
1	1	A	A-3		19.8835	4.56655e+06			757.485	436640	229665	-------			50	4.88092
1	1	A	A-4		19.8835	2.99833e+06			497.355	357770	150795	-------			0	4.1659
1	1	A	A-5		21.9471	378053			62.7104	224201	17225.7	-------			100	0.54055
1	1	A	A-6		20.9153	325906			54.0603	222557	15582.2	-------			50	0.607624
1	1	A	A-7		18.3358	333584			55.334	225168	18193.1	-------			0	0.715547
1	1	A	A-8		20.3994	3.78665e+06			628.119	392601	185626	-------		Wnt3a(5%)	100	9.77679
1	1	A	A-9		20.3994	4.53999e+06			753.08	429530	222555	-------			50	6.78116
1	1	A	A-10		20.9153	6.02682e+06			999.711	495129	288154	-------			0	7.3364
1	1	A	A-11		19.3676	521896			86.5707	233922	26946.9	-------			100	0.678376
1	1	A	A-12		20.6197	525637			87.1912	232467	25492	-------			50	0.457967
1	2	~	1		18.7281	0	B		-------	206975	0	-------
ERK	No	Group	Index	Name	Area(mm2)	AU-BG	B	Std	Ratio(%)	AU/mm2	(A-B)/mm2	Calibrated
1	1	A	A-1		36.2686	2.6316e+07		S	100	955963	725587	-------
1	1	A	A-2		32.8991	3.40807e+07			129.506	1.26629e+06	1.03592e+06	-------
1	1	A	A-3		32.136	4.08406e+07			155.193	1.50124e+06	1.27087e+06	-------
1	1	A	A-4		29.8145	3.14179e+07			119.387	1.28416e+06	1.05378e+06	-------
1	1	A	A-5		33.6837	3.05298e+07			116.012	1.13674e+06	906366	-------
1	1	A	A-6		29.0299	2.34133e+07			88.97	1.0369e+06	806524	-------
1	1	A	A-7		30.5883	2.03504e+07			77.3311	895677	665301	-------
1	1	A	A-8		31.3622	1.6907e+07			64.246	769464	539088	-------
1	1	A	A-9		29.8037	2.92252e+07			111.055	1.21096e+06	980587	-------
1	1	A	A-10		31.3622	3.586e+07			136.267	1.37379e+06	1.14342e+06	-------
1	1	A	A-11		30.5883	3.3583e+07			127.615	1.32828e+06	1.0979e+06	-------
1	1	A	A-12		30.7872	5.01024e+07			190.388	1.85776e+06	1.62738e+06	-------
1	2	~	1		35.6989	0	B		-------	230376	0	-------
