# Supplementary material for: A MET-PTPRK kinase-phosphatase rheostat controls ZNRF3 and Wnt signaling
Source: eLife. 2021 Sep 30;10:e70885. doi: 10.7554/eLife.70885 (PMC8516413; doi:10.7554/eLife.70885)
Supplement: Supplementary file 1. — Table of inhibitor screen results. The table includes the name of inhibitors, relative pTyr-ZNRF3 from two screens, average, and p-value. [file elife-70885-supp1.xlsx]

## Sheet: Sheet1
Supplementary file 1 : Processed data of the inhibitor screen for ZNRF3 4Y kinases
		pTyr-ZNRF3/ZNRF3-HA
Inhibitor		1st	2nd	Average	p-value (log 10)
	DMSO	1	1	1	-
EGFR	Erlotinib	0.86	0.47	0.665	-0.775961
	Canertinib	-2.2	0.54	-0.83	-0.689138
	Erbstatin	-1.52	2.48	0.48	-0.378087
	AG-494	-2.41	3	0.295	-0.377915
	AG-1478	-2.02	2.68	0.33	-0.385164
	RG-13022	-1.71	1.85	0.07	-0.459396
	AG-183	-0.84	1.21	0.185	-0.508818
	Lavendustin C	-0.07	1.51	0.72	-0.406594
FGFR	BGJ398	4.35	1.28	2.815	-0.650588
	TAS120	-0.08	0.93	0.425	-0.63851
VEGFR	Vatalanib	0.47	0.73	0.6	-0.992401
	KRN633	0.33	0.19	0.26	-1.53589
	Apatinib	0.56	0.38	0.47	-0.549164
	ABT-869	1.07	0.31	0.69	-0.549164
MET	Crizotinib	-0.41	-0.14	-0.275	-1.46954
	PHA-665752	0.62	0.35	0.485	-1.08869
	BMS-777607	-0.18	-0.02	-0.1	-1.64797
AXL	UNC569	0.66	0.27	0.465	-0.952182
FLT3	KW2449	1.5	0.39	0.945	-0.329952
ERBB2	AG-825	2.19	0.6	1.395	-0.450765
PDGFR	Imatinib	0.59	0.86	0.725	-0.839636
	Sunitinib	-0.28	0.39	0.055	-0.966042
	JNJ-10198409	0.05	0.43	0.24	-1.10639
	AG-370	1.23	1	1.115	-0.61051
	AG-1296	1.61	1.02	1.315	-0.618138
TRK	LOXO-101	1.77	0.65	1.21	-0.412336
	LOXO-195	2.73	0.43	1.58	-0.453306
PTK6	Tilfrinib	1.23	0.13	0.68	-0.478526
TNK2	XMD16-5	1.73	-0.01	0.86	-0.347452
EPHB3	LDN-211904	2.82	0.11	1.465	-0.403755
SFK	Dasatinib	-0.88	-0.62	-0.75	-1.63298
	Bosutinib	-0.64	-0.59	-0.615	-2.29808
	PP2	0.09	0.19	0.14	-1.72086
	Lck inhibitor	0.09	-0.09	0	-1.55308
FAK	NVP-TAE226	-0.04	-0.28	-0.16	-1.4768
TIE2	Tie2 Kinase inhibitor	0.93	0.67	0.8	-0.735752
YES	SU6656	0.72	-0.05	0.335	-0.777096
SYK	R406	-0.18	-0.04	-0.11	-1.70076
	Syk Inhibitor II	1.91	0.54	1.225	-0.399929
JAK	Ruxolitinib	2.26	0.8	1.53	-0.524179
